# Supplementary material for: Essential roles of three enhancer sites in σ54-dependent transcription by the nitric oxide sensing regulatory protein NorR
Source: PubMed Central journal article supplement — Nucleic Acids Res. 2009 Dec 2;38(4):1182–94. doi: 10.1093/nar/gkp1065 (PMC2831303; doi:10.1093/nar/gkp1065), 2009-12-02

## Supplementary Data

**Fig S1.** Determining the optimal protein:DNA ratio for ATPase activity. DNA titrations were performed at a fixed NorR $\Delta$ GAF concentrations: 35.6  $\mu$ M (**A**) or 1  $\mu$ M (**B**). ATP turnover was measured as  $\text{min}^{-1}$ . Reactions contained 1 mM ATP as substrate with 21 bp oligonucleotide that spans the NorR1 enhancer site (**A**, left panel), 66 bp oligonucleotide (**A**, right panel) or 266 bp fragment that spans all three sites (**B**). Stoichiometry of the complex is indicated on the x-axis as molar ratio of NorR $\Delta$ GAF monomer: dsDNA.

**A**

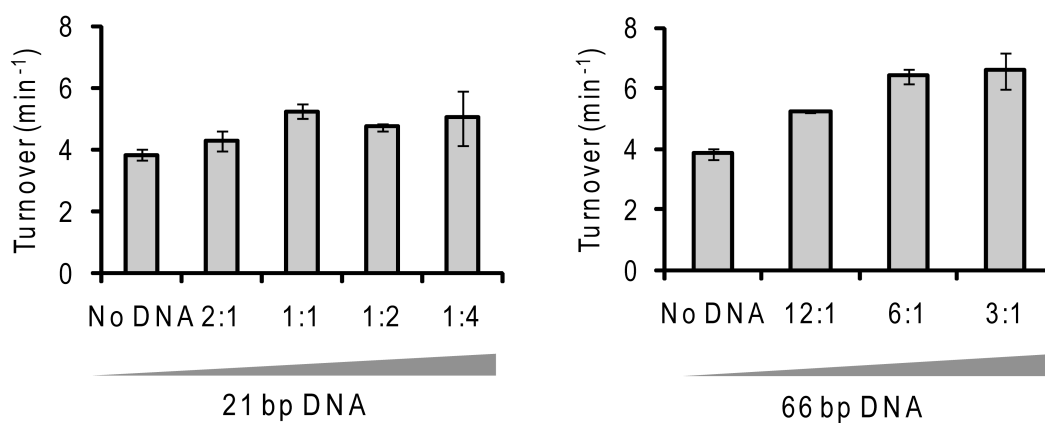

**B**

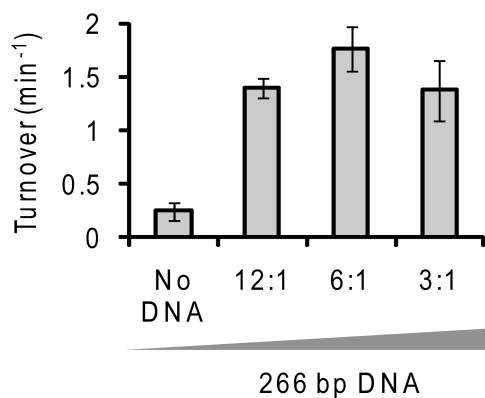

Supplement: gkp1065_1.pdf [file gkp1065_1.pdf]
